# Supplementary material for: Charge neutralized poly(β-amino ester) polyplex nanoparticles for delivery of self-amplifying RNA
Source: Royal Society of Chemistry journal article supplement (doi:10.1039/d3na00794d), 2024-01-01
Supplement: d3na00794d1.pdf [file d3na00794d1.pdf]

# Charge neutralized poly( $\beta$ -amino ester) polyplex nanoparticles for delivery of self-amplifying RNA

Nazgol Karimi Dastgerdi,<sup>ab</sup> Nurcan Gumus,<sup>a</sup> Hulya Bayraktutan,<sup>a</sup> Darryl Jackson,<sup>c</sup> Krunal Polra,<sup>d</sup> Paul F. McKay,<sup>d</sup> Fatemeh Atyabi,<sup>b</sup> Rassoul Dinarvand,<sup>be\*</sup> Robin J. Shattock,<sup>d</sup> Luisa Martinez-Pomares,<sup>c</sup> Pratik Gurnani,<sup>f\*</sup> Cameron Alexander<sup>a\*</sup>

## Supporting Information

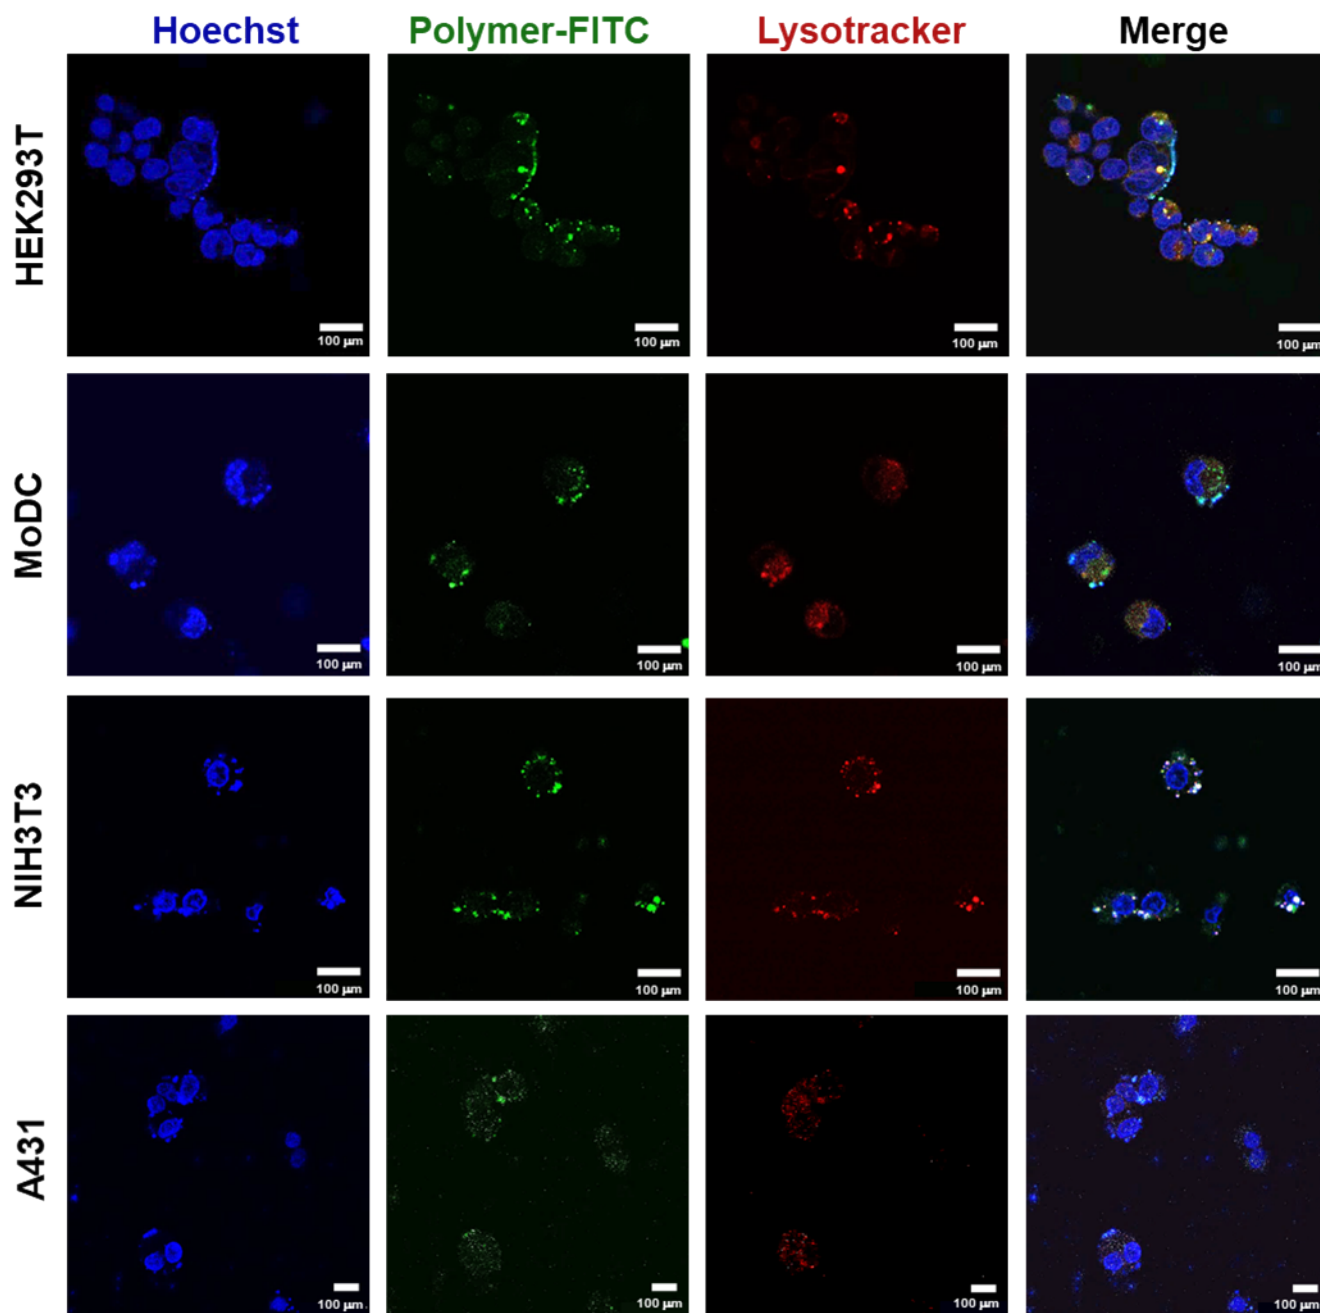

Figure S1. A) Confocal laser scanning microscopy images of different cell lines (HEK293T, moDC, NIH3T3, and A431) after 4 hr incubation with FITC labelled ternary complexes with N:C:P ratio 140:10:1. The nuclei were stained with Hoechst 33342 (blue) and lysosomes were stained with LysoTracker Red. Scale bar = 100  $\mu$ m. Images have enhanced contrast for greater clarity.

## Polyplex

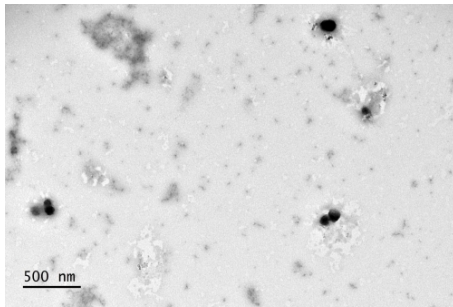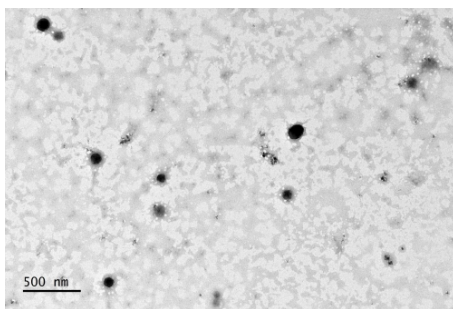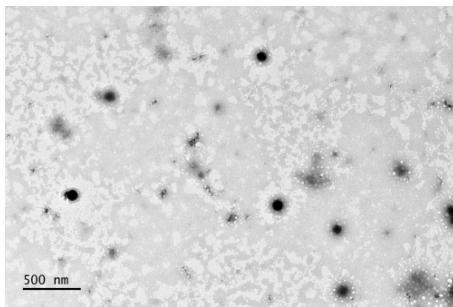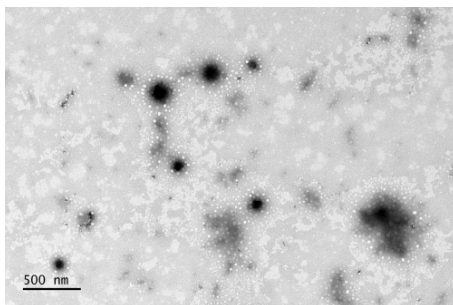

## Ternary complex

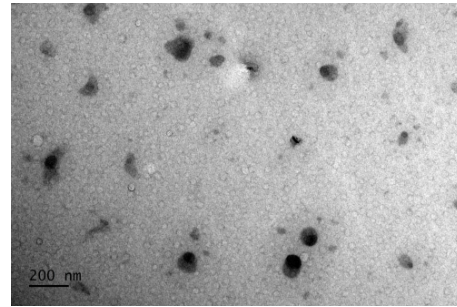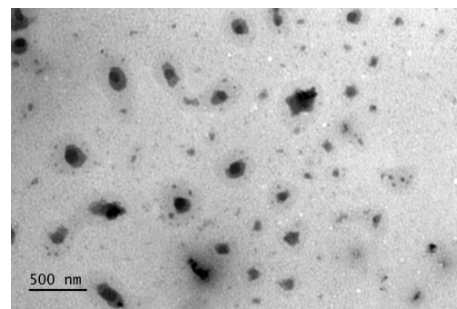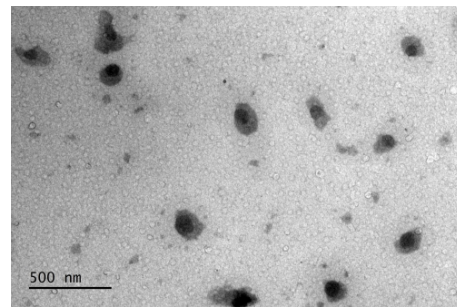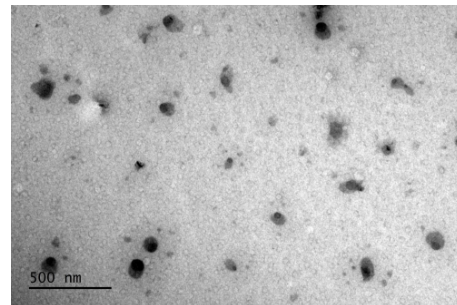

Figure S2. Transmission electron micrographs of PBAE-RNA polyplexes and PBAE- $\gamma$ -PGA-RNA ternary complexes.
